# Supplementary material for: Huaxian formula alleviates nickel oxide nanoparticle-induced pulmonary fibrosis via PI3K/AKT signaling
Source: Springer Nature journal article supplement (doi:10.1038/s41598-025-01899-y), 2025-05-22

IB

Protein Name:  $\beta$ -actin  
Brand: Signalway Antibody  
Observed Band: 43KD  
Catalog No.: 21338-1

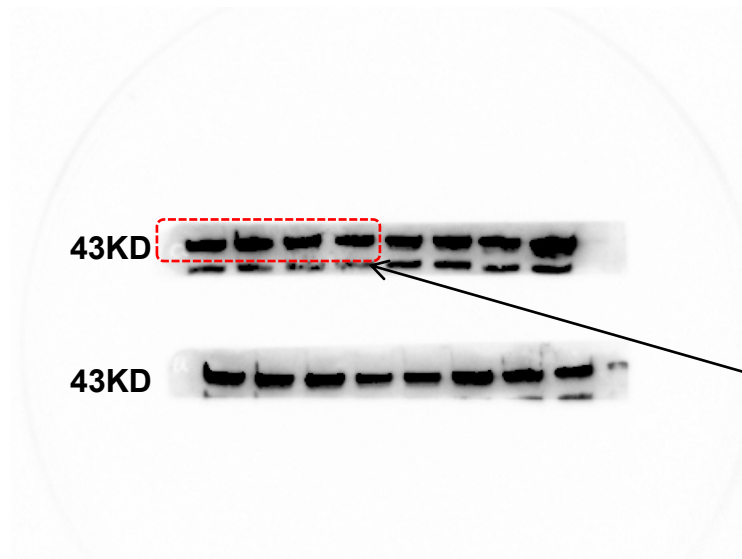

From left to right: control group,  
nano NiO group, nano NiO + 500  
mg/kg HXF, and nano NiO +  
1000 mg/kg HXF.

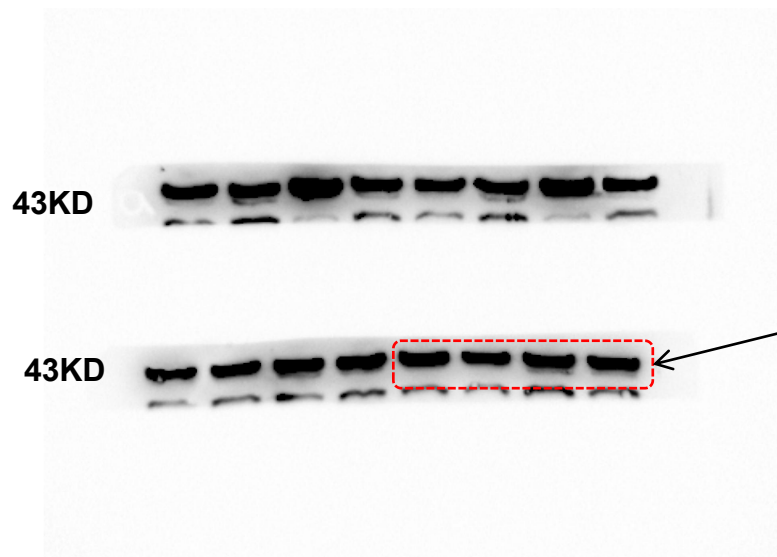

Figure 8

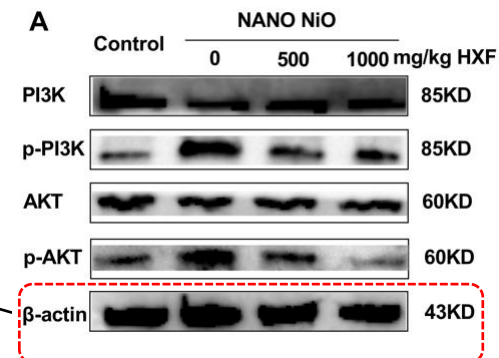

Figure 7

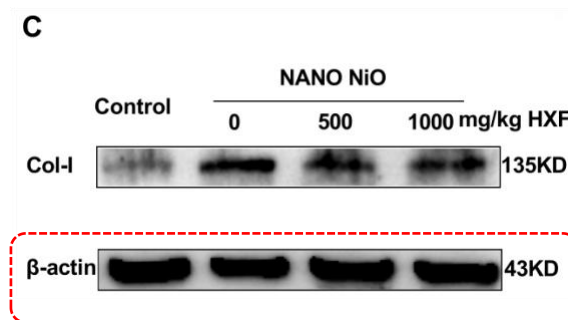

# IB

**Protein Name:** Col-I  
**Brand:** Immunoway  
**Observed Band:** 135KD  
**Catalog No.:** YT5769

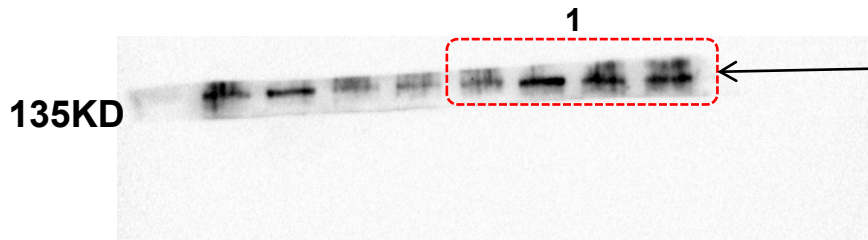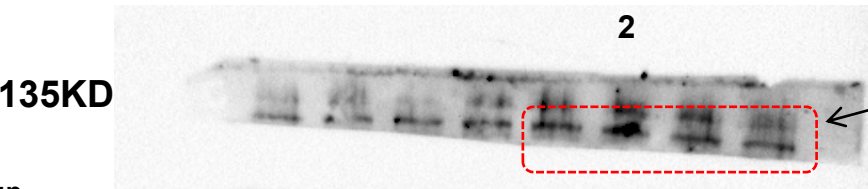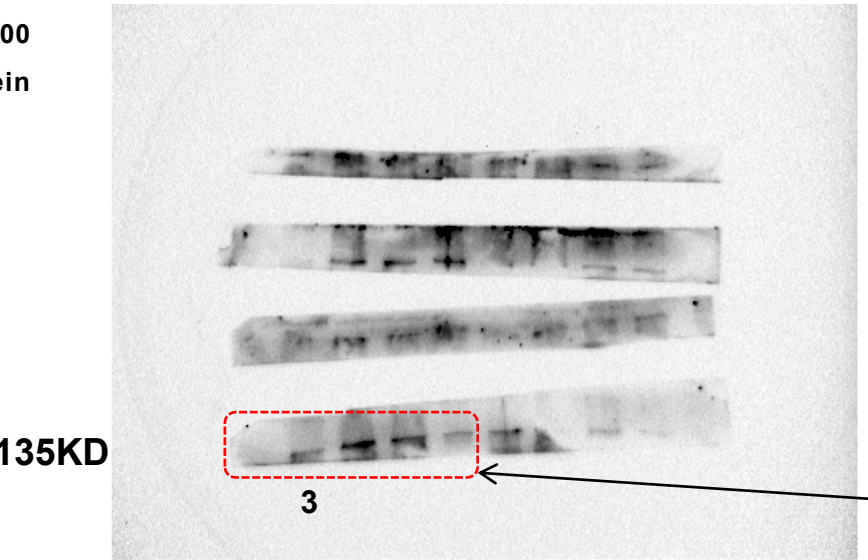

From left to right: control group,  
 nano NiO group, nano NiO + 500  
 mg/kg HXF, and nano NiO + 1000  
 mg/kg HXF. Each target protein  
 was tested at least three times.

**Figure 7**

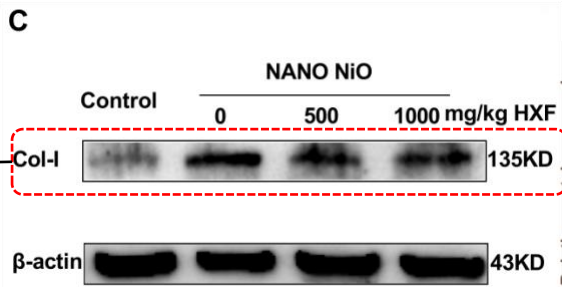

# IB

Protein Name: PI3K  
 Brand: Immunoway  
 Observed Band: 85KD  
 Catalog No.: YT6156

Figure 8

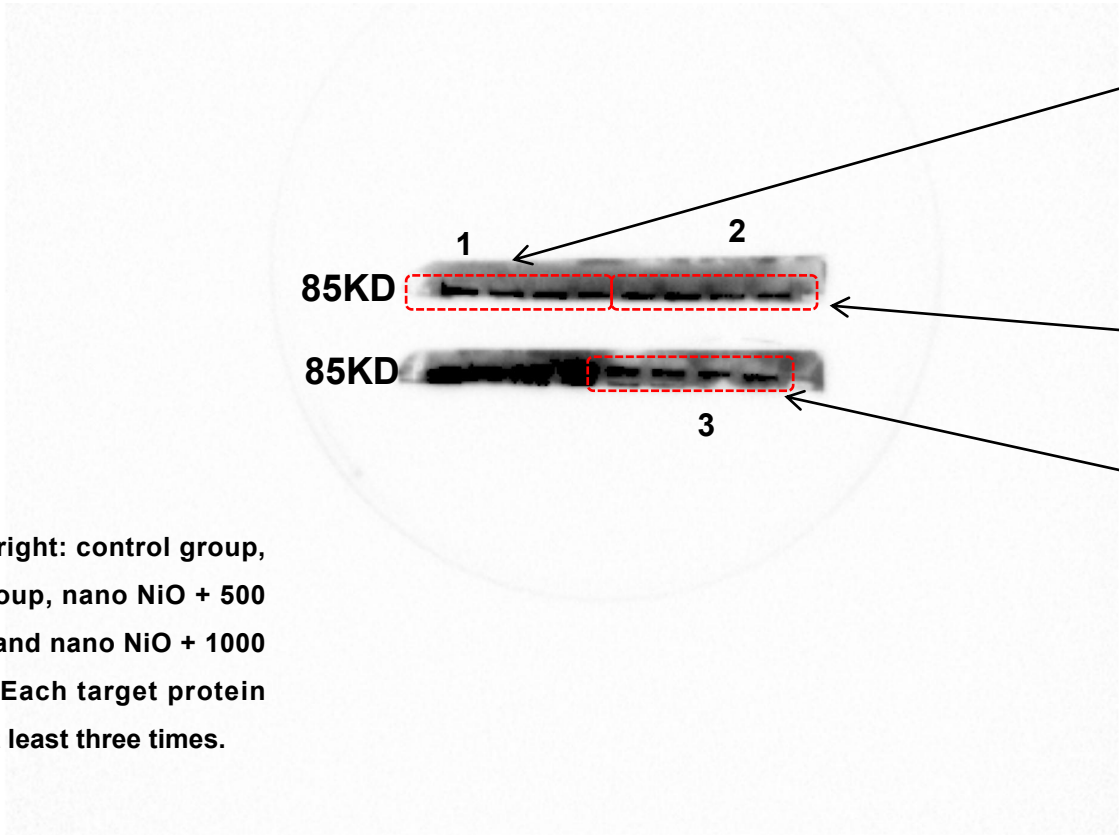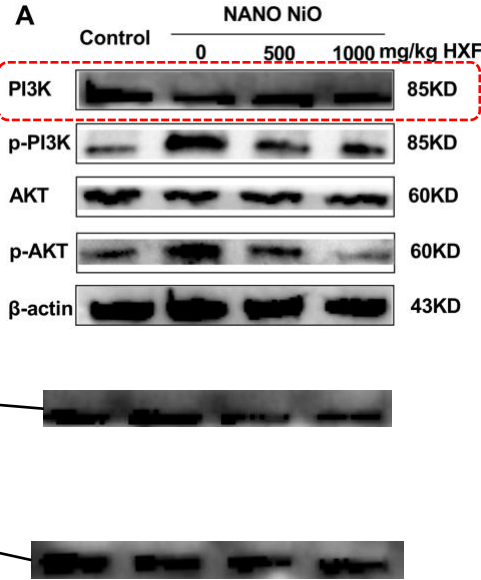

From left to right: control group,  
 nano NiO group, nano NiO + 500  
 mg/kg HXF, and nano NiO + 1000  
 mg/kg HXF. Each target protein  
 was tested at least three times.

# IB

**Protein Name:** p-PI3K<sup>Tyr467</sup>  
**Brand:** Immunoway  
**Observed Band:** 85KD  
**Catalog No.:** YP0224

From left to right: control group,  
 nano NiO group, nano NiO + 500  
 mg/kg HXF, and nano NiO + 1000  
 mg/kg HXF. Each target protein  
 was tested at least three times.

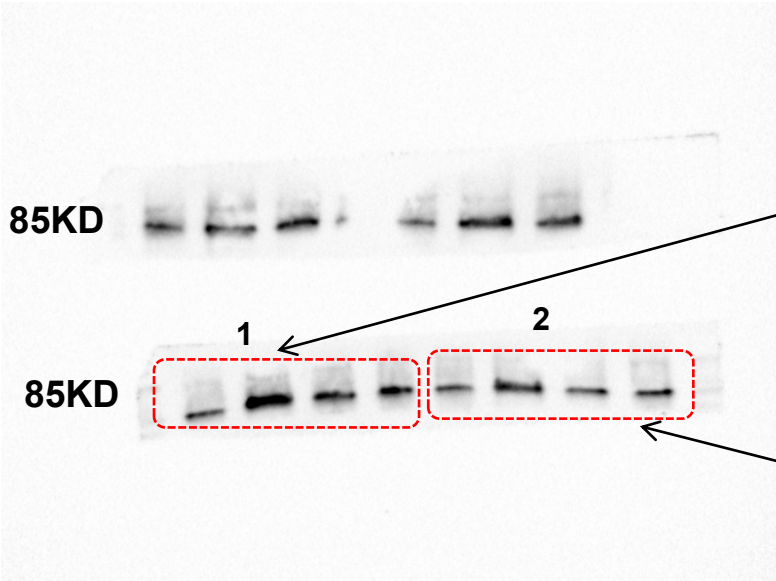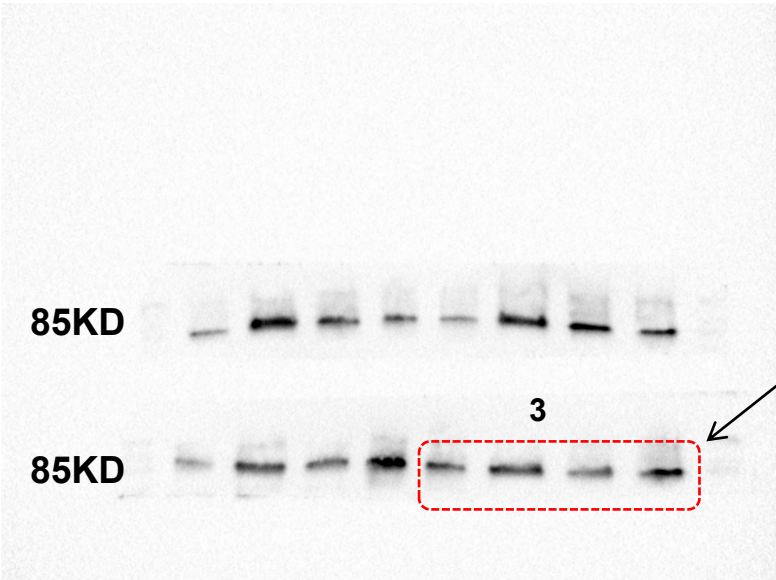

**Figure 8**

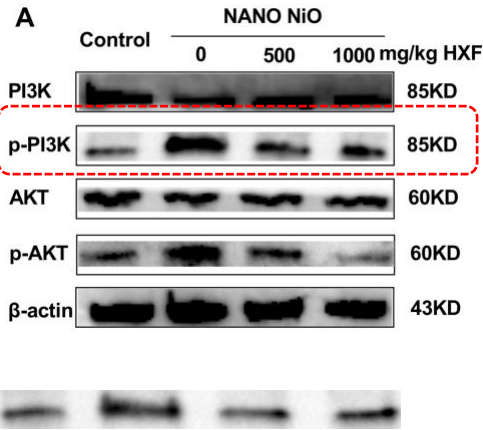

# IB

Protein Name: AKT  
Brand: Immunoway  
Observed Band: 60KD  
Catalog No.: YM3618

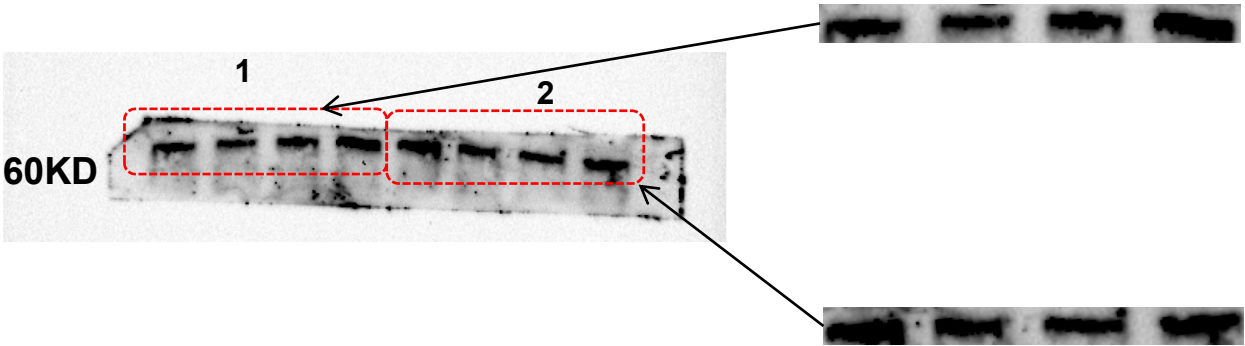

From left to right: control group, nano NiO group, nano NiO + 500 mg/kg HXF, and nano NiO + 1000 mg/kg HXF. Each target protein was tested at least three times.

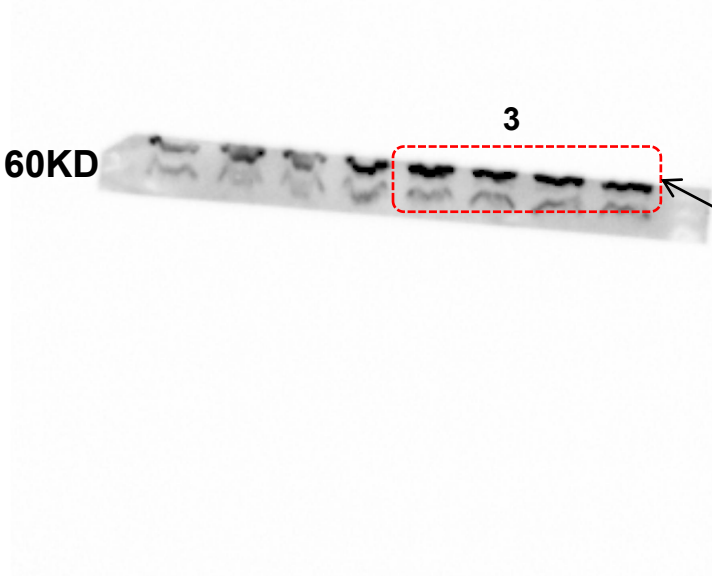

Figure 8

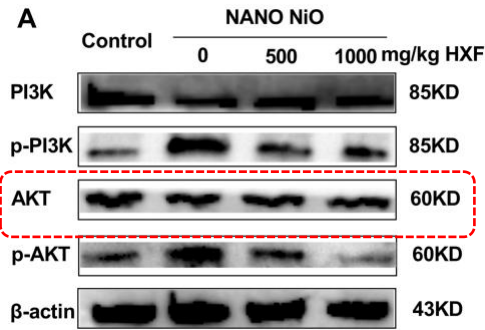

# IB

Protein Name: p-AKT<sup>Ser473</sup>  
Brand: Immunoway  
Observed Band: 60KD  
Catalog No.: YP0006

From left to right: control group, nano NiO group, nano NiO + 500 mg/kg HXF, and nano NiO + 1000 mg/kg HXF. Each target protein was tested at least three times.

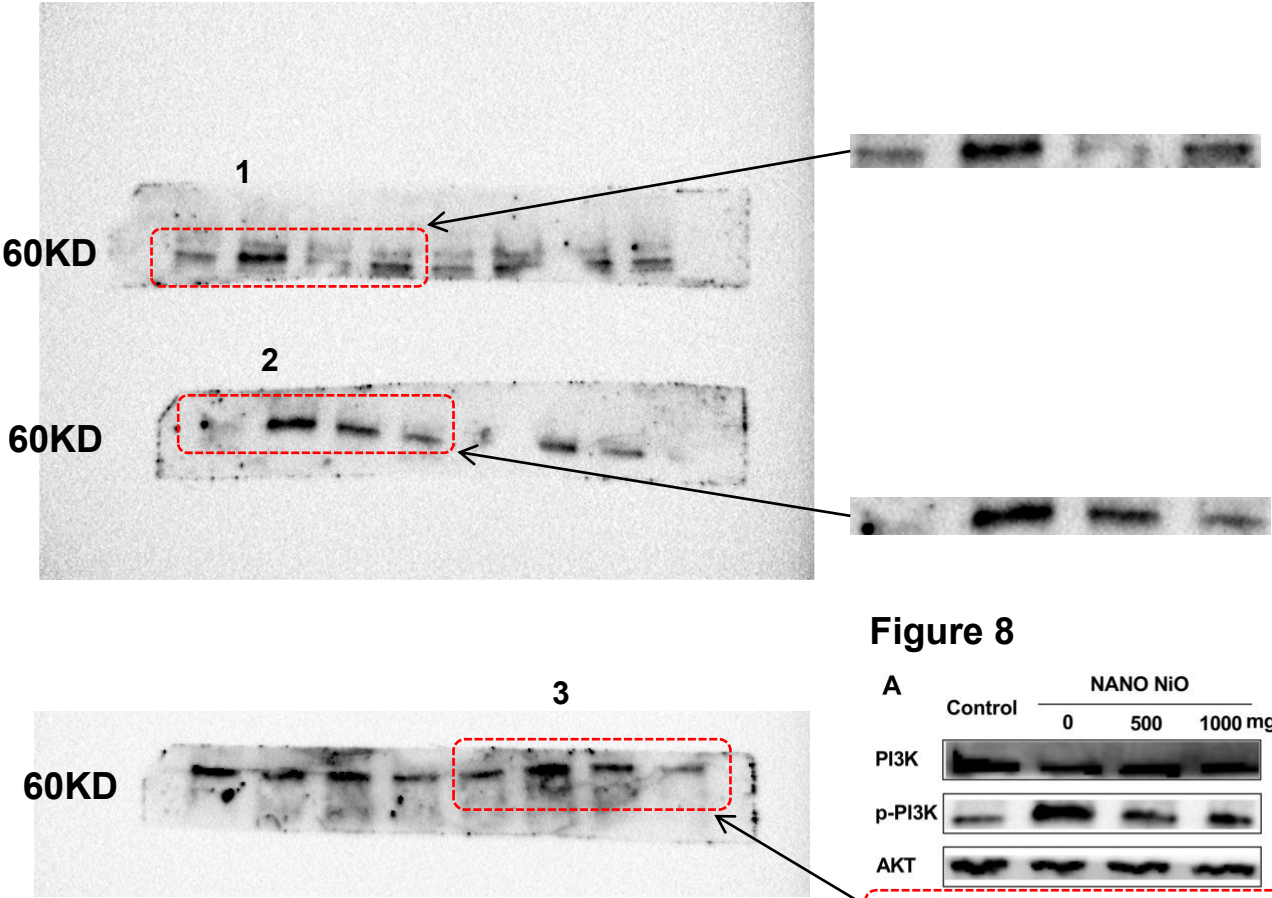

Figure 8

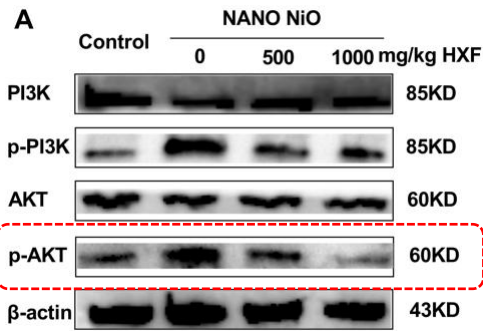

Supplement: MOESM1 [file 41598_2025_1899_MOESM1_ESM.pdf]
